# Supplementary material
Source: PubMed Central journal article supplement (PMC5893394)
Supplement: NIHMS940050-supplement-1.pdf [file NIHMS940050-supplement-1.pdf]

## Supplementary Figure 1

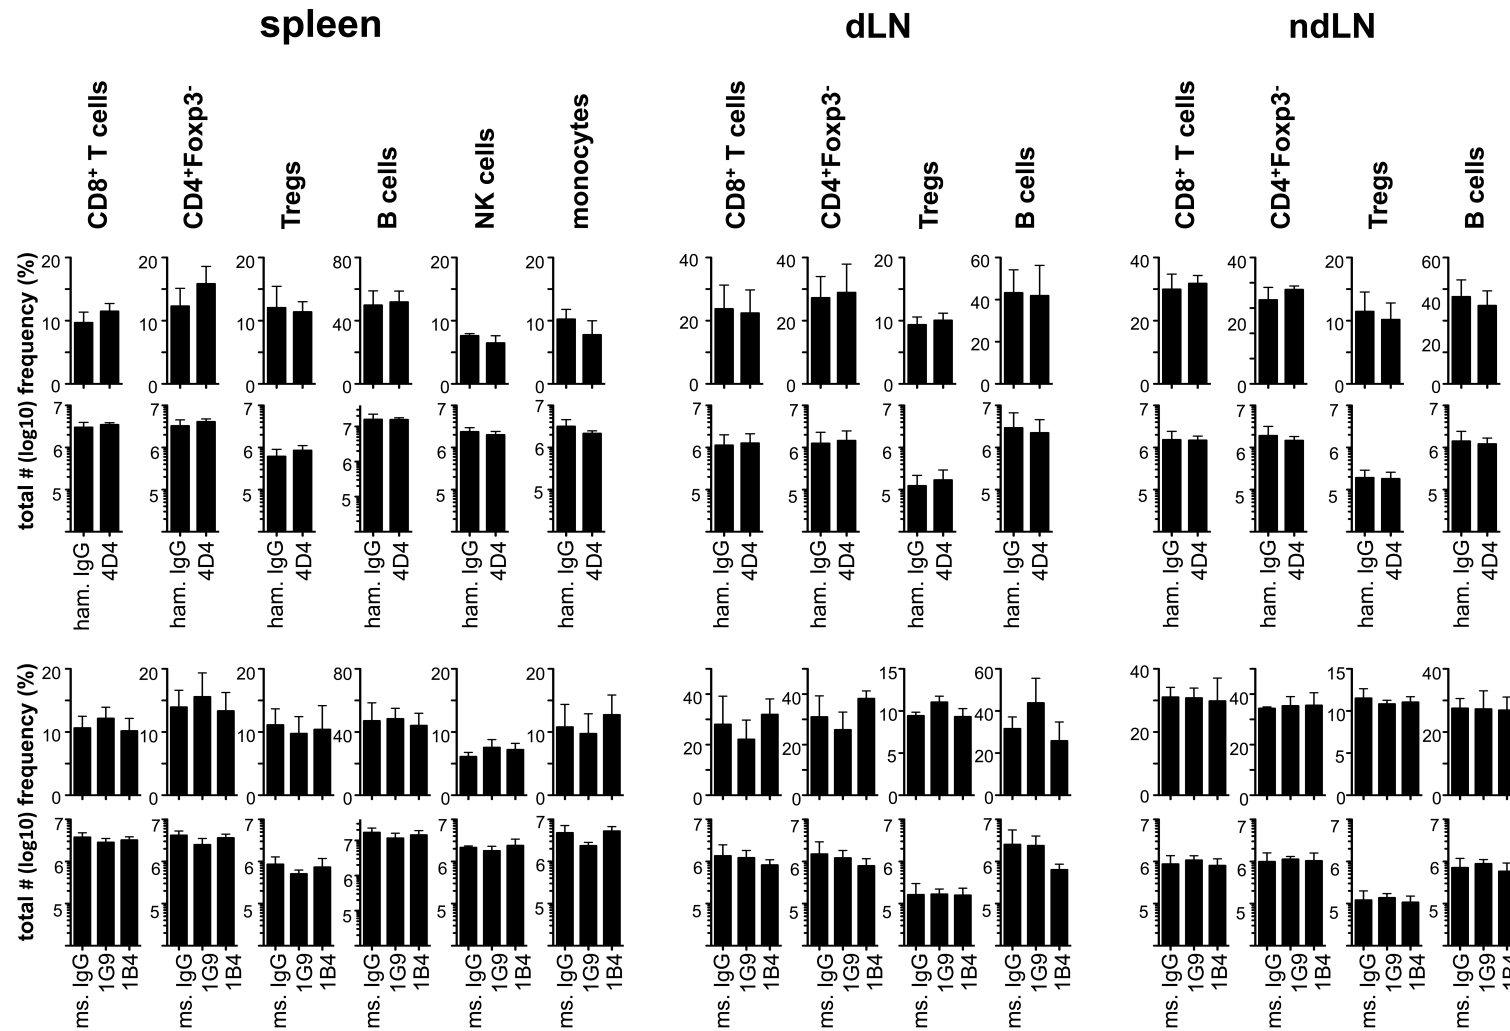

**Supplementary Figure 1. Anti-TIGIT antibodies do not alter the immune cell composition upon immunization.** Wild type B6 mice were immunized s.c. with 100 $\mu$ g MOG<sub>35-55</sub> peptide in CFA and received 100 $\mu$ g anti-TIGIT (or isotype control: Armenian hamster IgG for clone 4D4 or mouse IgG1 for 1G9 and 1B4) antibody i.p on days 0, 2, and 4. On day 10 spleens, draining and non-draining lymph nodes (dLN: draining lymph node, ndLN: non-draining lymph node) were collected and frequencies and absolute numbers of immune cells were assessed by flow cytometry. Data are shown as mean  $\pm$  SD of pooled data from two independent experiments (n=6).
